# Supplementary material for: A facile synthesis of highly porous CdSnO3 nanoparticles and their enhanced performance in lithium-ion batteries
Source: Royal Society of Chemistry journal article supplement (doi:10.1039/c3ta14563h), 2014-01-01
Supplement: c3ta14563h.pdf [file c3ta14563h.pdf]

## Electronic Supplementary Information

### Facile synthesis of highly porous CdSnO<sub>3</sub> nanoparticles and enhanced lithium-ion battery performance

Linlin Wang<sup>a,b</sup>, Wanqun Zhang<sup>a</sup>, Caihua Wang<sup>a</sup>, Dake Wang<sup>a</sup>, Zhongping Liu<sup>a</sup>, Qiaoyan  
Hao<sup>a</sup>, Yan Wang<sup>a</sup>, Kaibin Tang<sup>\*a</sup> and Yitai Qian<sup>a,c</sup>

Division of Nanomaterials and Chemistry Hefei National Laboratory for Physical  
Sciences at the Microscale. Department of Chemistry, University of Science and  
Technology of China, Hefei 230026, P.R. China. E-mail: kbtang@ustc.edu.cn. Phone:  
86-551-3601791.

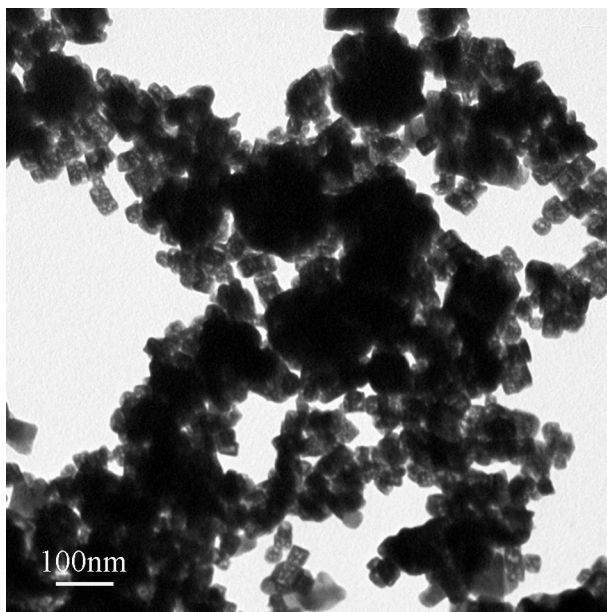

**Fig. S1.** TEM image of CdSnO<sub>3</sub> prepared with C<sub>6</sub>H<sub>8</sub>O<sub>7</sub>·H<sub>2</sub>O.

---

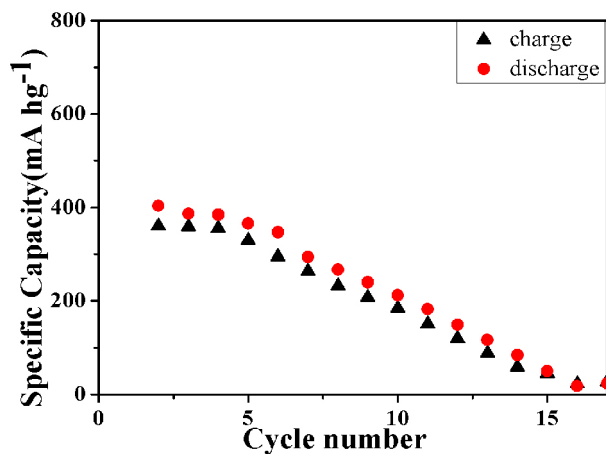

**Fig. S2.** Cycle performance of the bulk CdSnO<sub>3</sub> sample at a current rate of 70 mA g<sup>-1</sup> (from the 2<sup>nd</sup> cycle to 17<sup>th</sup> cycle).
